# Supplementary material for: Yeast-2-Hybrid data file showing progranulin interactions in human fetal brain and bone marrow libraries
Source: PubMed Central journal article supplement (PMC5126125; doi:10.1016/j.dib.2016.11.031), 2016-11-19

# Conflicts of Interest Statement

---

**Manuscript title:** Yeast-2-Hybrid data file showing progranulin interactions in human fetal brain and bone marrow libraries

---

---

The authors whose names are listed immediately below certify that they have NO affiliations with or involvement in any organization or entity with any financial interest (such as honoraria; educational grants; participation in speakers' bureaus; membership, employment, consultancies, stock ownership, or other equity interest; and expert testimony or patent-licensing arrangements), or non-financial interest (such as personal or professional relationships, affiliations, knowledge or beliefs) in the subject matter or materials discussed in this manuscript.

**Author names:**  
Irmgard Tegeder



Supplement: mmc1.pdf [file mmc1.pdf]
